# Supplementary material for: Community‐based participation of children with and without disabilities
Source: PubMed Central journal article supplement — Dev Med Child Neurol. 2019 Nov 25;62(4):445–53. doi: 10.1111/dmcn.14402 (PMC7078992; doi:10.1111/dmcn.14402), 2019-11-25
Supplement: DMCN-62-445-s005.pdf [file DMCN-62-445-s005.pdf]

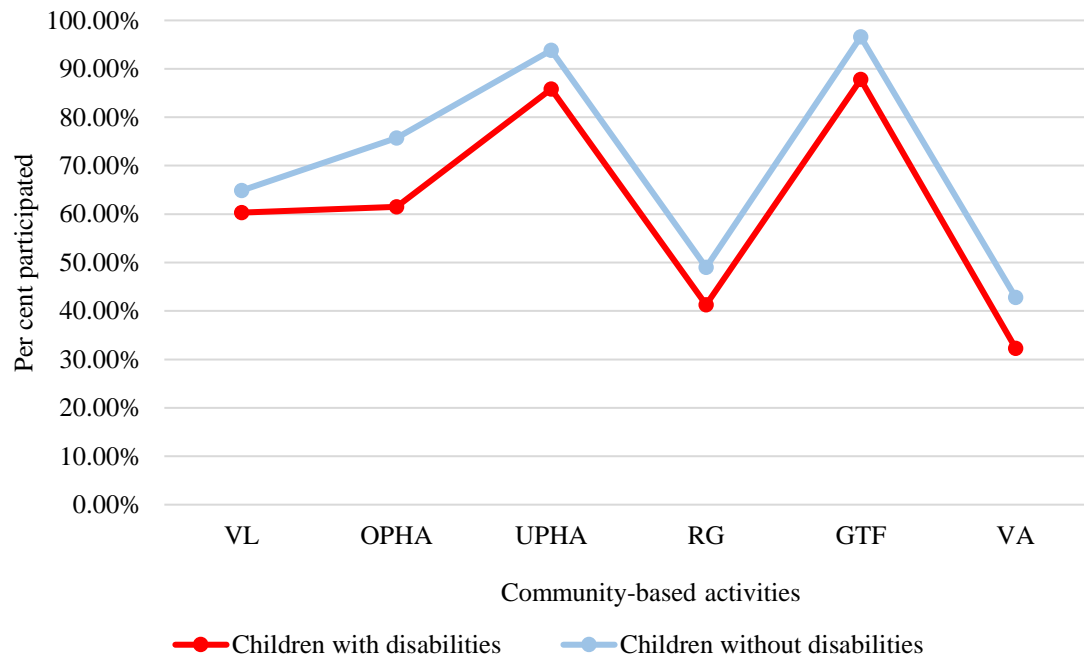

*Note. VL - Visiting a library; OPHA - Organized physical activities; UPHA - Unstructured physical activities; RG - Religious gatherings; GTF - Getting together with friends; VA - Vacations abroad*

**Figure S1. Percentages of children aged 10-12 who participated in each community-based activity**
